# Supplementary material
Source: PubMed Central journal article supplement (PMC6488365)
Supplement: NIHMS1007405-supplement-Supp_figS1-7.pdf [file NIHMS1007405-supplement-Supp_figS1-7.pdf]

## A. Generating a screening pool

Col-0 *pRAB18::GFP*  
+ EMS (M1)

## B. Screening for high GFP fluorescence

M2 plants  
treated with ABA/DFPM

UV lamp  
Microplate reader  
Microscope

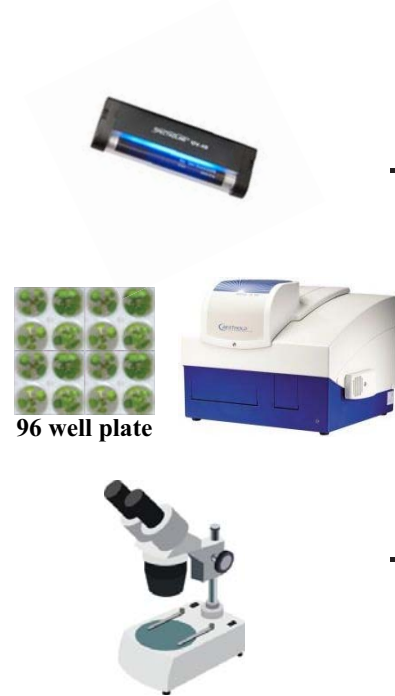

## C. *rda* mutants

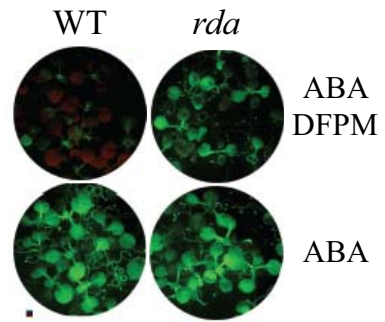

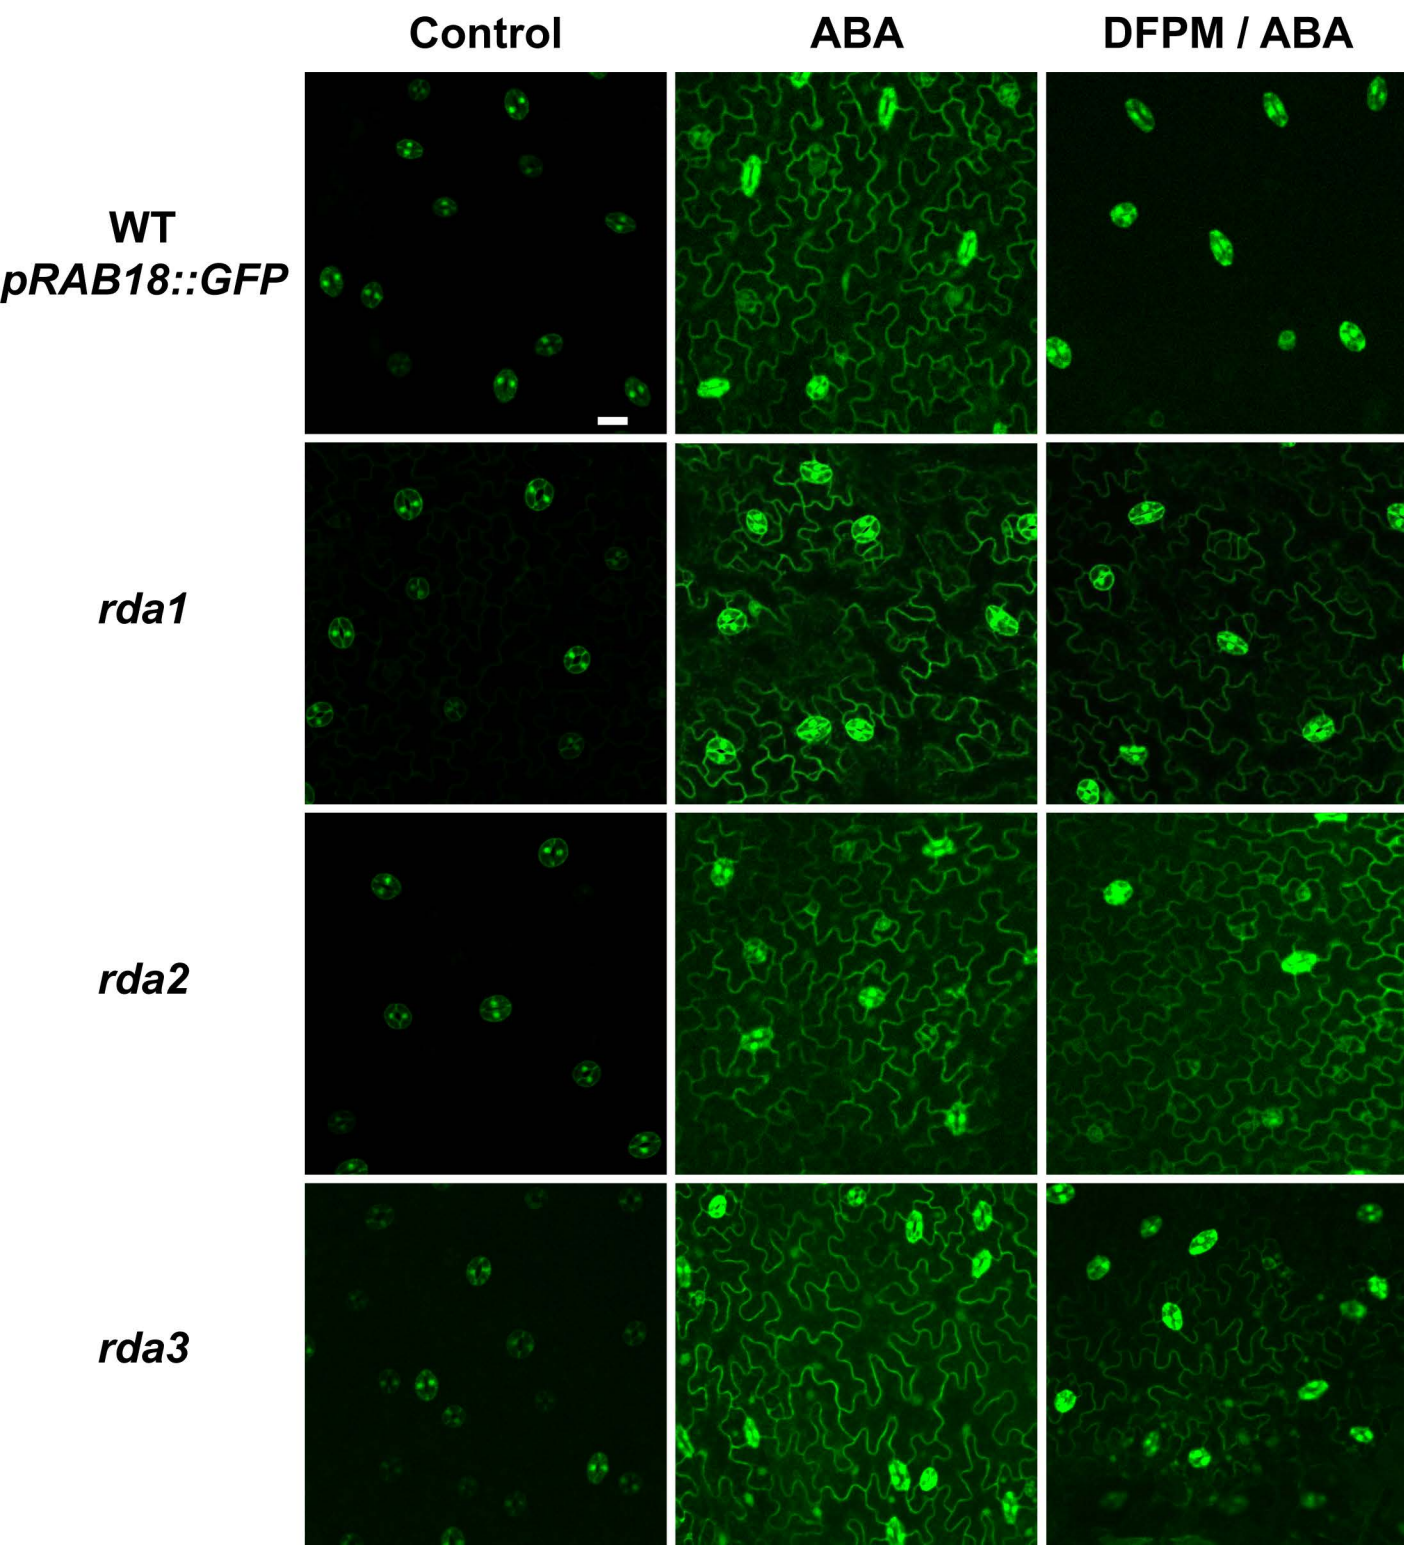

**A**

**WT** *pRAB18::GFP* *rda2* *eds1* *pad4*

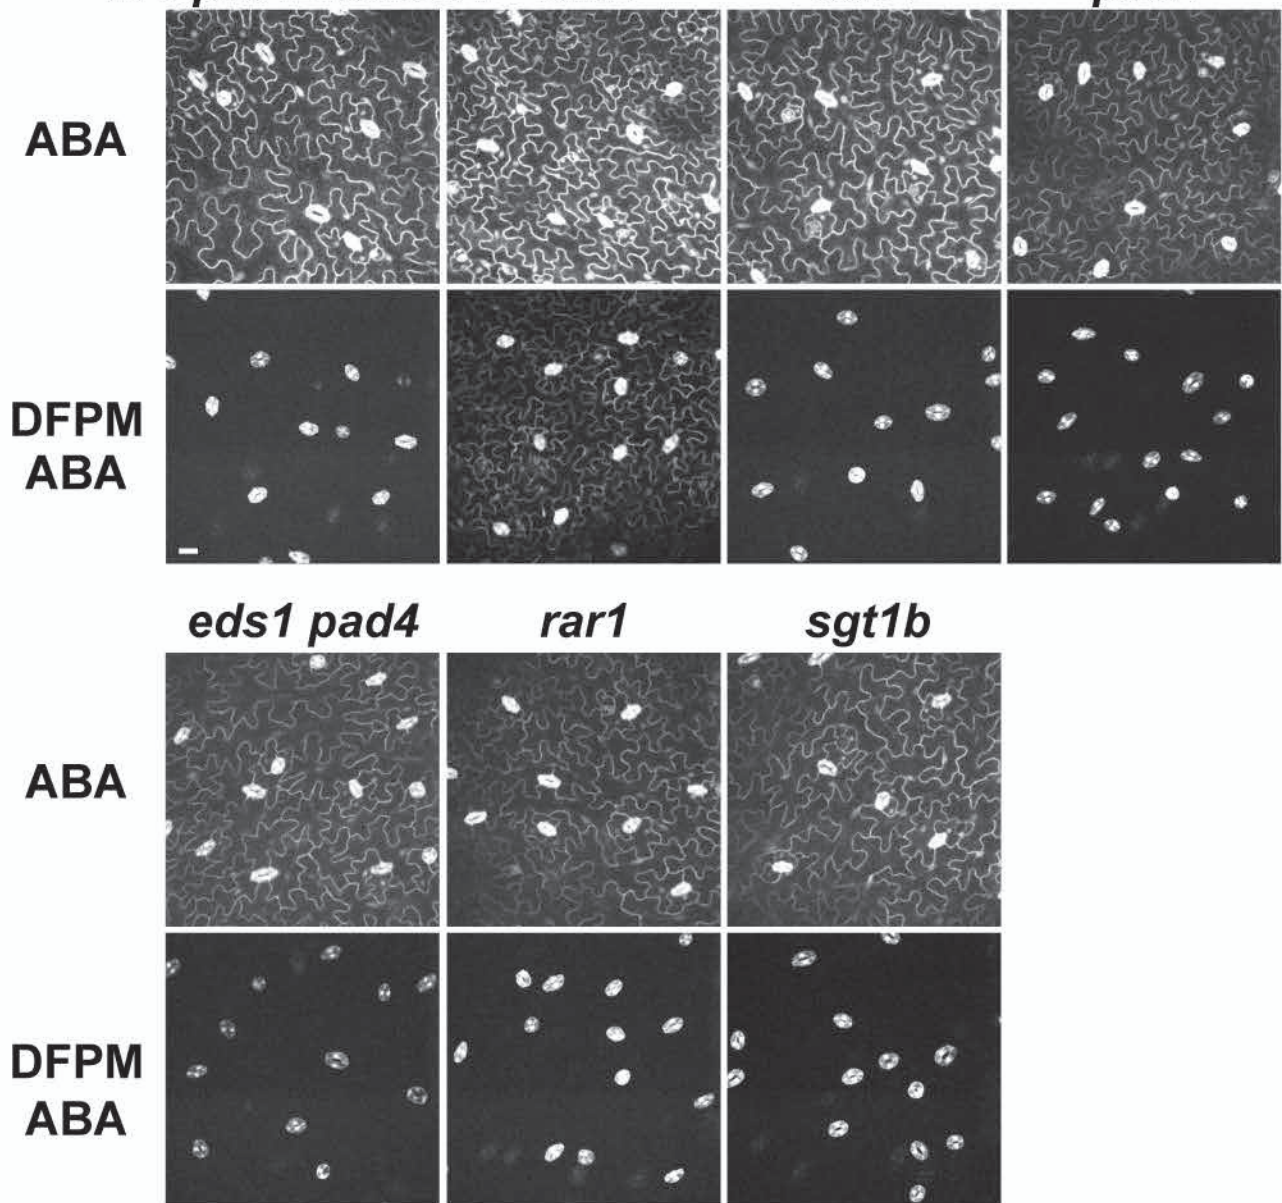**B**

**WT** *pRAB18::GFP* *vict1* *victl1*

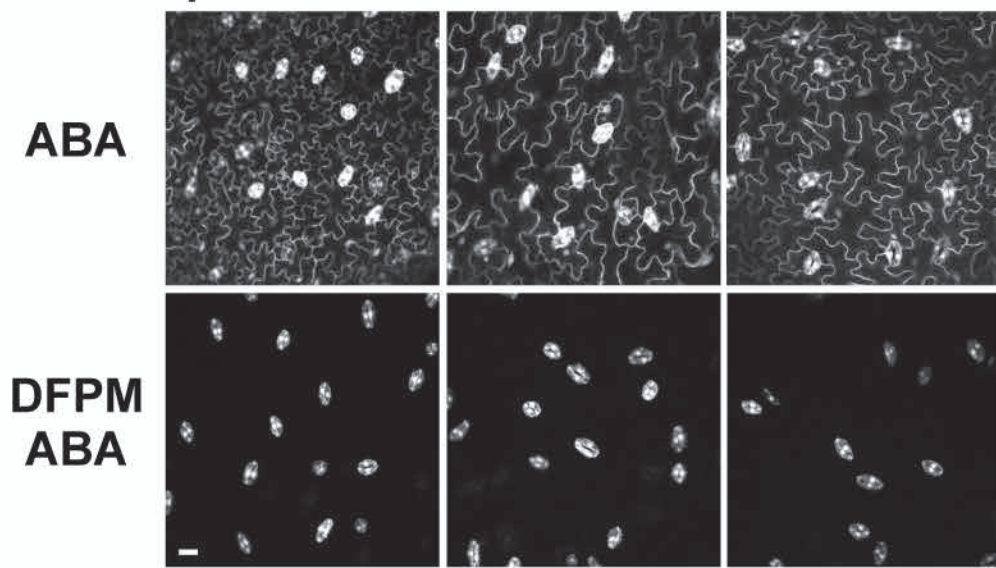

A

Mutants

*At1g11330* (SALK\_143489)

Crossed with

*x rda2**x WT pRAB18::GFP*

ABA

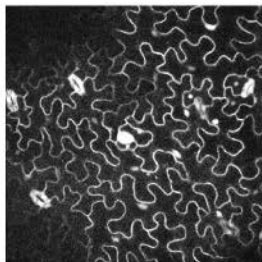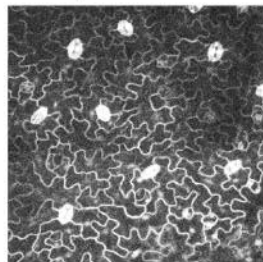

DFPM / ABA

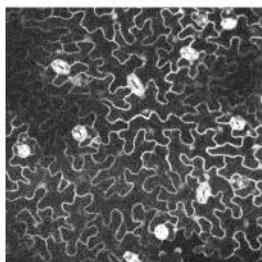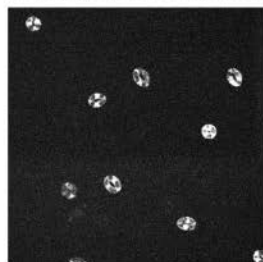

(60/120)

(12/12)

B

*At1g09750* (GABI\_565C02)*x rda2**x WT pRAB18::GFP*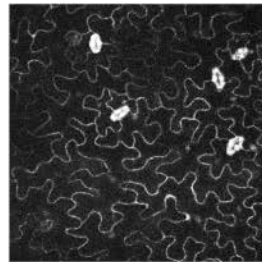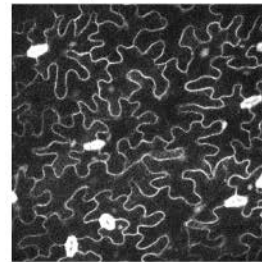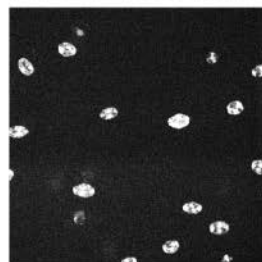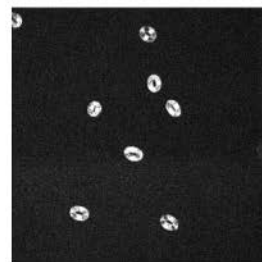

(30/30)

(4/4)

**WT *pRAB18::GFP***      ***rda2-1***

DFPM      0    15    30    60      0    15    30    60

(kD)

75

50

37

25

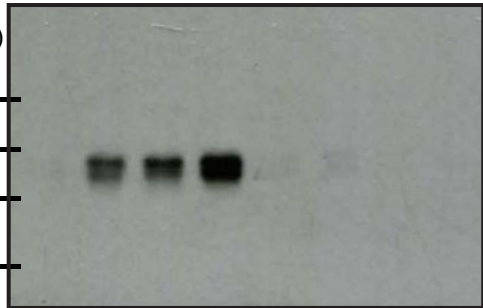

$\alpha$ -phospho-p44/42 ERK

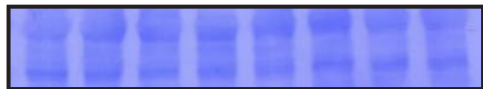

Membrane blot

**WT**      ***rda2-2***

0    15    30    60      0    15    30    60 min

(kD)

75

50

37

25

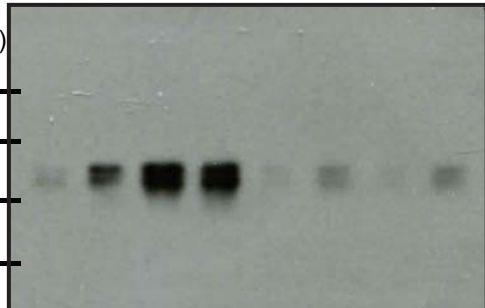

$\alpha$ -phospho-p44/42 ERK

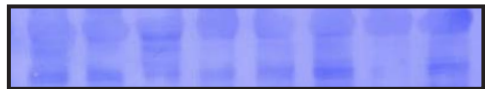

Membrane blot

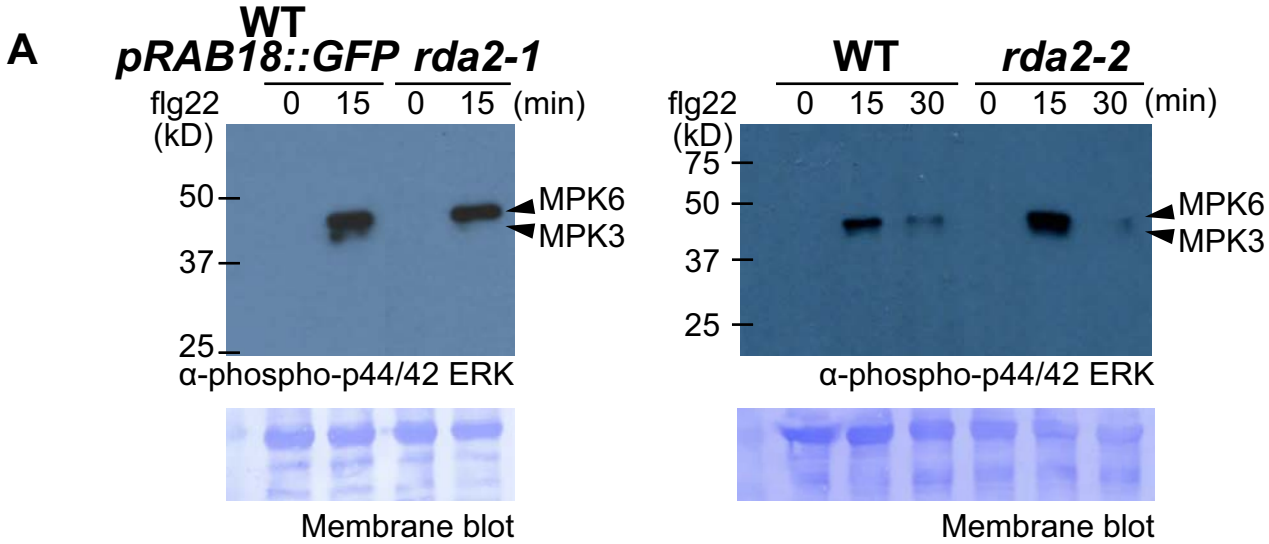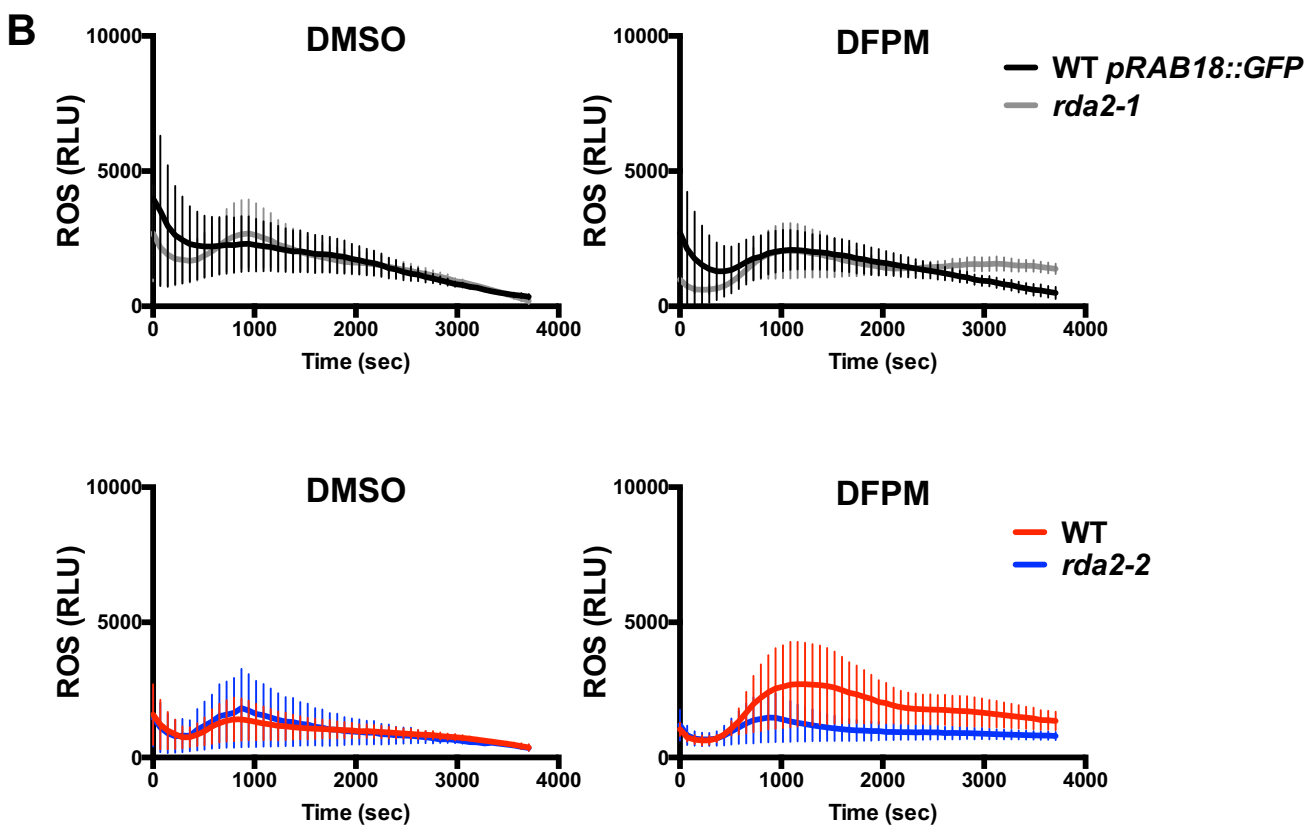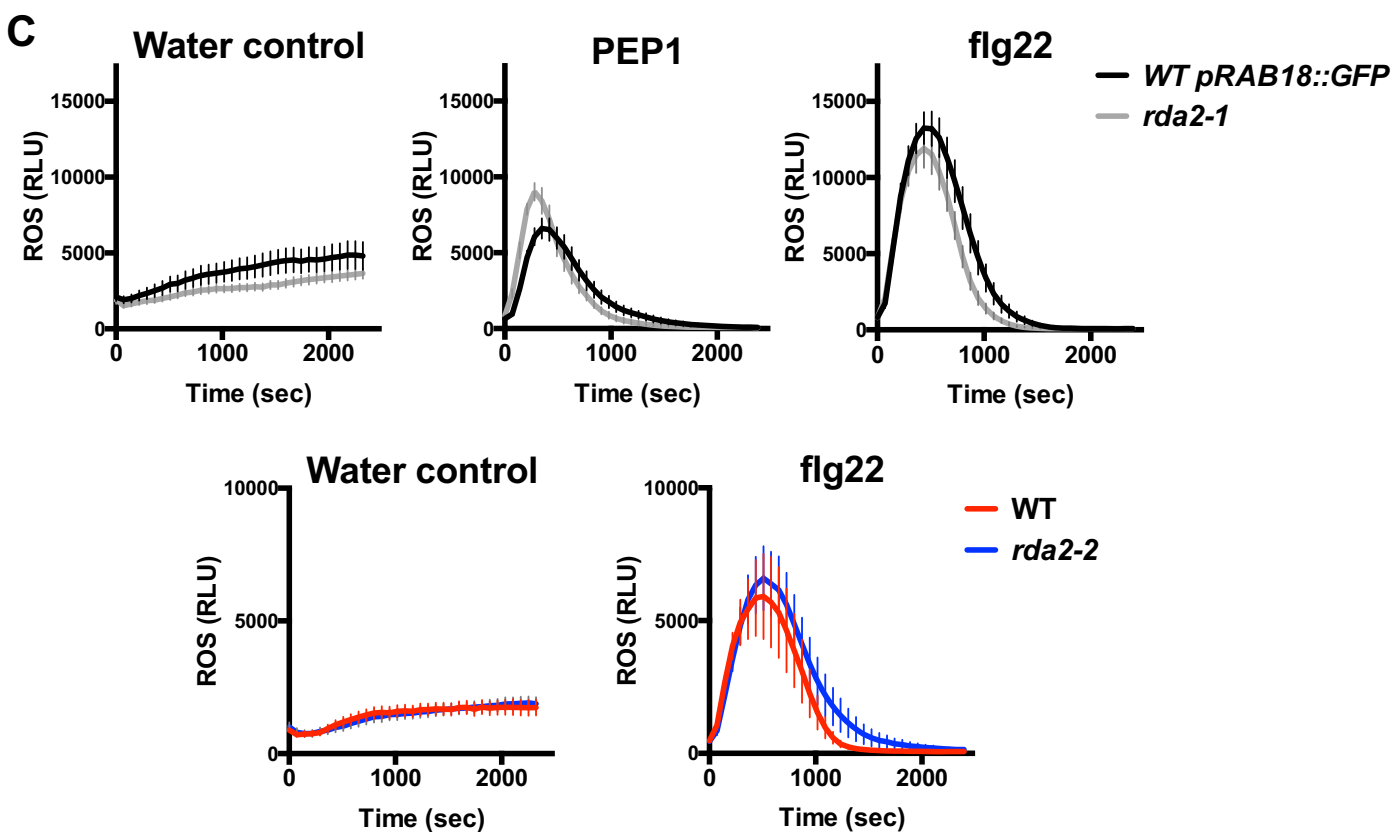

*rda2-1*

*rda2-2*

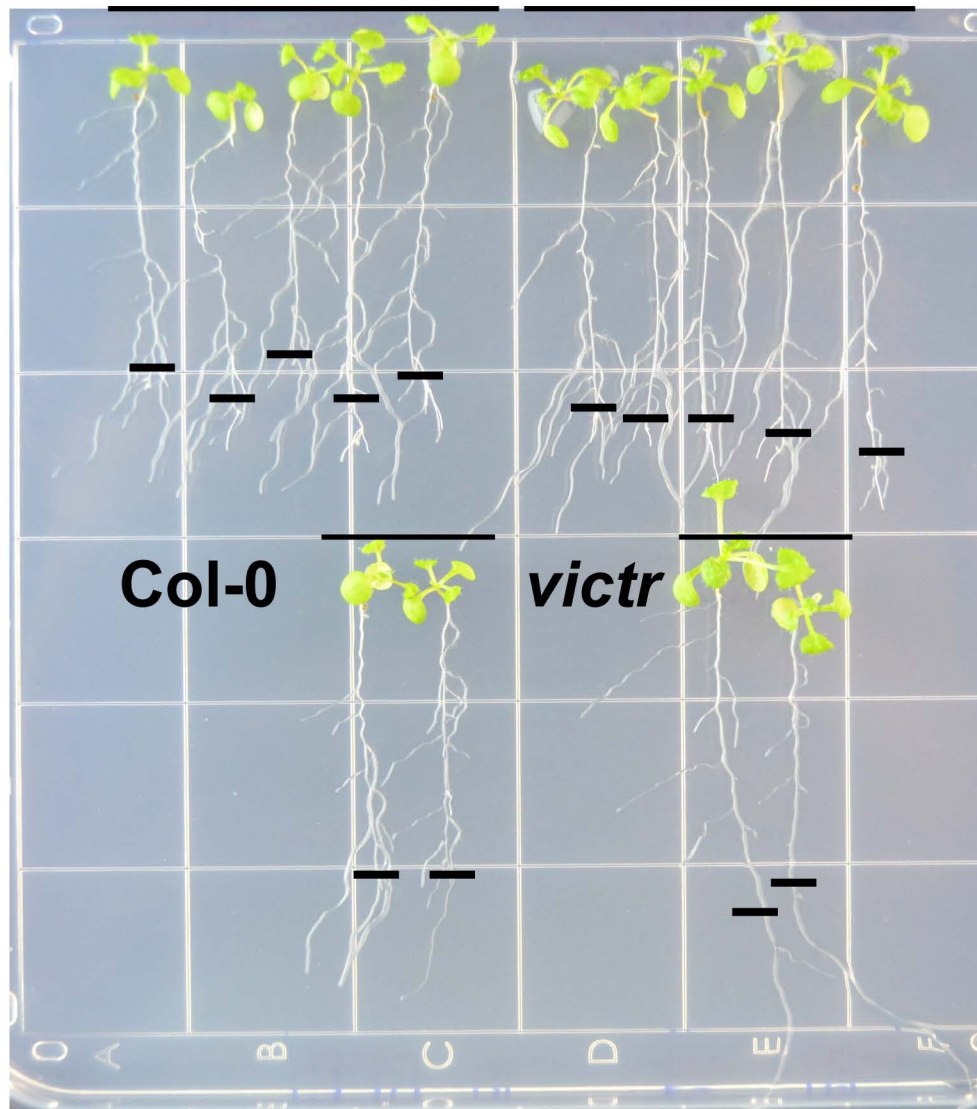

*Col-0*

*victr*
